# Supplementary material
Source: MDPI journal article supplement (https://www.mdpi.com/2071-1050/11/18/5038)
Supplement: s1 [file s1]

## Supplementary Materials

The governing equations for the ZC ocean model consists of the reduced-gravity model for the vertical averaged ocean current ( $u, v$ ) above the thermocline together with an imbedded constant depth mixed layer. The reduced-gravity model is written as follows:

$$u_t - \beta_0 y v = -g' h_x + \tau_x / \rho H \quad (S1)$$

$$\beta_0 y u = -g' h_y + \tau_y / \rho H \quad (S2)$$

$$h_t + H(u_x + v_y) = 0 \quad (S3)$$

$$H u = H_1 u_1 + H_2 u_2 \quad (S4)$$

The subscripts 1, 2 refer to the current in the mixed layer and the underlying layer, respectively.  $\rho$  is ocean density, and  $\tau$  is the surface wind stress,  $H$  and  $H_1$  refer to the climate mean thermocline depth and a constant mixed layer depth. This reduced-gravity model equation is the same as that in ZC except the weak linear friction is ignored for consistency as we used the model code of *McGregor et al.* [2007] for simulations of wave upwelling.

The equations governing the shear (with subscripts) between layers 1, 2 are:

$$r_s u_s - \beta_0 y u_s = \tau_x / \rho H_1 \quad (S5)$$

$$r_s v_s - \beta_0 y v_s = \tau_y / \rho H_1 \quad (S6)$$

$$\mathbf{u}_s = \mathbf{u}_1 - \mathbf{u}_2 \quad (S7)$$

Here a strong momentum mixing between the two layers is represented by a strong

frictional coefficient  $r_s=(2\text{day})^{-1}$ .

The upwelling velocity can then be derived as:

$$\begin{aligned} W_1 &= H_1[(u_1)_x + (v_1)_y] \\ &= \frac{H_1}{H} \cdot H[u_x + v_y] + \frac{H_2}{H} \cdot H_1[(u_s)_x + (v_s)_y] \\ &= \frac{H_1}{H} \cdot W_h + (1 - \frac{H_1}{H}) \cdot W_e \end{aligned} \tag{S8}$$

In this paper, instead of assuming  $H$  as a constant, we take the zonal variations in the climate mean of thermocline depth into consideration and thus define the vertical velocity at 50 meter as

$$W = (1 - R(x)) \cdot W_e + R(x) \cdot W_h \tag{S9}$$

Here,  $R(x)$  represents the weighting function which depends on longitude (Figure S1). The

Ekman pumping upwelling is defined the same way as in ZC as follows:

$$w_e = H_1[(u_s)_x + (v_s)_y] \tag{S10}$$

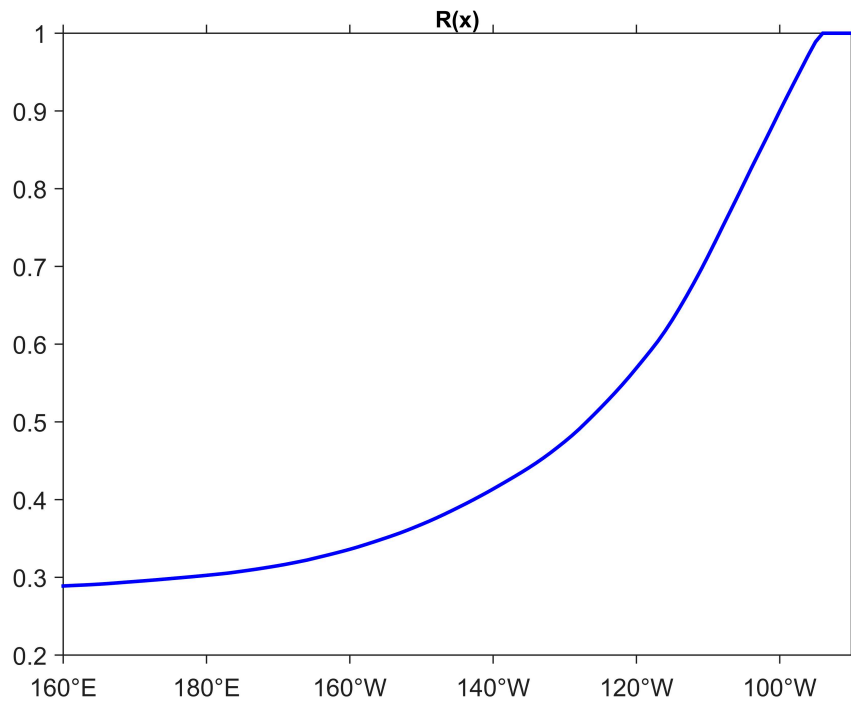

**Figure S1.** The weighting function  $R(x)$  used to estimate the equatorial Pacific upwelling annual cycle.
